# Supplementary material
Source: publisher figshare collection journal article supplement (https://sage.figshare.com/ndownloader/files/18737147)
Supplement: Supplementary file 1 [file 18737147]

## Appendix 1:

Resources to support shared decision-making (ShDM) conversations about antibiotic use in acute respiratory tract infections

| Training Programs                                                         | Website                                                                                                                                                                                                                                                                                                        | Description                                                                                                                                                                                                                                                                                                                  |
|---------------------------------------------------------------------------|----------------------------------------------------------------------------------------------------------------------------------------------------------------------------------------------------------------------------------------------------------------------------------------------------------------|------------------------------------------------------------------------------------------------------------------------------------------------------------------------------------------------------------------------------------------------------------------------------------------------------------------------------|
| Canada Research Chair in Shared Decision Making and Knowledge Translation | <a href="http://www.decision.chaire.fmed.ulaval.ca/accueil-en">www.decision.chaire.fmed.ulaval.ca/accueil-en</a>                                                                                                                                                                                               | <ul style="list-style-type: none"> <li>• links to available training programs from each province in Canada</li> <li>• updated regularly</li> </ul>                                                                                                                                                                           |
| Ottawa Decision Support Tutorial                                          | <a href="https://decisionaid.ohri.ca/ODST/index.php">https://decisionaid.ohri.ca/ODST/index.php</a>                                                                                                                                                                                                            | <ul style="list-style-type: none"> <li>• free online training on ShDM for clinicians</li> <li>• available in English and French</li> </ul>                                                                                                                                                                                   |
| <b>Decision Aids</b>                                                      |                                                                                                                                                                                                                                                                                                                |                                                                                                                                                                                                                                                                                                                              |
| Australian Commission on Safety and Quality in Health Care                | <a href="https://www.safetyandquality.gov.au/our-work/partnering-consumers/shared-decision-making/decision-support-tools-patients">https://www.safetyandquality.gov.au/our-work/partnering-consumers/shared-decision-making/decision-support-tools-patients</a>                                                | <ul style="list-style-type: none"> <li>• decision aids for acute bronchitis, pharyngitis, and otitis media</li> </ul>                                                                                                                                                                                                        |
| The Ottawa Hospital                                                       | <a href="https://decisionaid.ohri.ca/AZlist.html">https://decisionaid.ohri.ca/AZlist.html</a>                                                                                                                                                                                                                  | <ul style="list-style-type: none"> <li>• repository of decision aids for ARTIs and numerous other conditions</li> <li>• tools may be printable fact sheets or interactive online guides</li> </ul>                                                                                                                           |
| <b>Patient Education Resources</b>                                        |                                                                                                                                                                                                                                                                                                                |                                                                                                                                                                                                                                                                                                                              |
| Choosing Wisely Canada                                                    | <a href="https://choosingwiselycanada.org/campaign/antibiotics/">https://choosingwiselycanada.org/campaign/antibiotics/</a><br><a href="https://choosingwiselycanada.org/wp-content/uploads/2017/09/Prescription-Pad.pdf">https://choosingwiselycanada.org/wp-content/uploads/2017/09/Prescription-Pad.pdf</a> | <ul style="list-style-type: none"> <li>• <i>Using Antibiotics Wisely</i> campaign provides recommendations for prescribers in primary care, hospital, and long-term care</li> <li>• additional resources include a tip sheet for prescribers, viral prescription pads, and waiting room posters about antibiotics</li> </ul> |
| Public Health Agency of Canada                                            | <a href="https://www.canada.ca/en/public-health/services/antibiotic-antimicrobial-resistance.html">https://www.canada.ca/en/public-health/services/antibiotic-antimicrobial-resistance.html</a>                                                                                                                | <ul style="list-style-type: none"> <li>• information about the impact of antimicrobial resistance and preventative measures</li> <li>• links to external printable and online resources that raise awareness about antibiotic resistance</li> </ul>                                                                          |
| Public Health Ontario                                                     | <a href="https://www.publichealthontario.ca/en/health-topics/antimicrobial-stewardship/primary-care">https://www.publichealthontario.ca/en/health-topics/antimicrobial-stewardship/primary-care</a>                                                                                                            |                                                                                                                                                                                                                                                                                                                              |
| RxTx (e-CPS)                                                              |                                                                                                                                                                                                                                                                                                                | <ul style="list-style-type: none"> <li>• Assessment of Patients with Upper Respiratory Tract Symptoms</li> <li>• table of "Talking Points when Patients Request Antibiotics for Acute Bronchitis"</li> <li>• condition-specific "Therapeutic Tips"</li> <li>• updated frequently</li> </ul>                                  |

Ko L et al. Shared-decision making and antibiotic stewardship: will pharmacists rise to the challenge? *Can Pharm J* (Ott) 2020;153. DOI: 10.1177/1715163519882464.
